# Supplementary material for: Rapid isotopic analysis of uranium, plutonium, and americium in post-detonation debris simulants by RIMS
Source: Royal Society of Chemistry journal article supplement (doi:10.1039/d3ja00096f), 2023-01-01
Supplement: d3ja00096f1.pdf [file d3ja00096f1.pdf]

### Supplemental Material

| Uranium and Am isotope ratios for spiked geostandard samples. |                                 |                                 |                                 |                                   |
|---------------------------------------------------------------|---------------------------------|---------------------------------|---------------------------------|-----------------------------------|
|                                                               | $^{234}\text{U}/^{238}\text{U}$ | $^{235}\text{U}/^{238}\text{U}$ | $^{236}\text{U}/^{238}\text{U}$ | $^{241}\text{Am}/^{243}\text{Am}$ |
| BCR-2A                                                        | 0.0171(1)                       | 1.738(2)                        | 0.0264(2)                       | 0.653(2)                          |
| BCR-2B                                                        | 0.0149(1)                       | 1.517(2)                        | 0.0230(2)                       | 0.640(2)                          |
| BCR-2C                                                        | 0.0098(1)                       | 0.997(2)                        | 0.0151(2)                       | 0.606(2)                          |
| BCR-2D                                                        | 0.0175(1)                       | 1.771(2)                        | 0.0269(2)                       | 0.647(2)                          |
| BHVO2+                                                        | 0.01043(2)                      | 1.0003(1)                       | 0.00152(1)                      | -                                 |

| Plutonium isotope ratios for spiked geostandard samples. |                                   |                                   |                                   |                                   |
|----------------------------------------------------------|-----------------------------------|-----------------------------------|-----------------------------------|-----------------------------------|
| Sample                                                   | $^{238}\text{Pu}/^{239}\text{Pu}$ | $^{240}\text{Pu}/^{239}\text{Pu}$ | $^{241}\text{Pu}/^{239}\text{Pu}$ | $^{242}\text{Pu}/^{239}\text{Pu}$ |
| BCR-2x                                                   | 0.00263(8)                        | 0.2407(3)                         | 0.00525(8)                        | 0.01561(5)                        |

Background-corrected isotope ratios were calculated according to:

$$R_{ab} = \frac{(N_a - N_{a,B})}{(N_b - N_{b,B})} \quad (1)$$

where  $N_i$  is the number of counts in peak  $i$  and  $N_{iB}$  is the number of background counts in peak  $i$ .

The uncertainty in isotope ratio measurements is calculated from counting statistics:

$$\sigma^2 = \sum_i \left( \frac{\delta R_{ab}}{\delta N_i} \right)^2 \sigma_i^2 \quad (2)$$

where  $\sigma_i$  is the uncertainty in  $N_i$ . Applying (2) to (1) and recognizing that for counting statistics  $\sigma_i = \sqrt{N_i}$  gives:

$$\sigma^2 = \frac{N_a}{(N_b - N_{b,B})^2} + \frac{N_{a,B}}{(N_b - N_{b,B})^2} + \frac{N_b(N_a - N_{a,B})^2}{(N_b - N_{b,B})^4} + \frac{N_{b,B}(N_a - N_{a,B})}{(N_b - N_{b,B})^4} \quad (3)$$

which, after simplification, yields

$$\sigma = R_{ab} \sqrt{\frac{N_a + N_{a,B}}{(N_a - N_{a,B})^2} + \frac{N_b + N_{b,B}}{(N_b - N_{b,B})^2}} \quad (4)$$
